# Supplementary material for: Evaluation of Using Behavioural Changes to Assess Post-Operative Pain in the Guinea Pig (Cavia porcellus)
Source: PLoS One. 2016 Sep 1;11(9):e0161941. doi: 10.1371/journal.pone.0161941 (PMC5008650; doi:10.1371/journal.pone.0161941)
Supplement: S1 Table — (XLSX) [file pone.0161941.s001.xlsx]

## Sheet: AnyMaze
Guinea pig	Time (1=baseline, 2=anaesthesia 1h, 3=anaesthesia 5h, 4=surgery 1h, 5=surgery 5h, 6= day post surgery 1h, 7=day post surgery 5h)	Treatment group (0=control, 1=treated)	Distance travelled (m)	Time immobile (s)	Latency to mobility (s)	Time in corner (s)	Immobile in corner (s)	Latency to leave corner (s)
1	1	1	47.361	677	0	104.3	42.1	46.2
1	2	1	6.841	1721.4	46.7	1546.9	215.4	9.3
1	3	1	19.036	1269.7	0	1394.2	628.5	22.3
1	4	1	19.6	1319.9	0	1016.1	377.4	12.3
1	5	1	20.851	769.1	0	867	648	10.9
1	6	1	20.8	1354.7	0	286.8	114.6	16.8
1	7	1	25.712	309.1	0	301.7	269.2	663.8
2	1	0	16.067	1108.1	0	2095.6	1108.3	66.5
2	2	0	7.533	1631.2	34.9	2170.5	545	47.5
2	3	0	5.493	1707.5	0	153.7	15.8	99.4
2	4	0	12.95	1506.6	0	1208.6	242.1	13.4
2	5	0	2.516	2088.8	38.9	422.5	128.7	64.1
2	6	0	7.139	1606.9	70.2	811.7	183.6	20.7
2	7	0	10.712	1320.5	0	1096.1	325.9	56.3
3	1	0	27.623	251.5	0	1921.6	1670.1	62.3
3	2	0	16.634	933.4	0	56.3	56.3	18.4
3	3	0	7.97	1922.1	0	1475.8	119	15.8
3	4	0	4.428	1930.4	0	369.6	134.7	8.2
3	5	0	4.377	1959.3	314.8	1739.2	332.5	564.9
3	6	0	10.464	1305.7	47.8	4.4	1.4	278.9
3	7	0	2.937	2260.5	0	0	0
4	1	0	42.718	709.2	0	255.2	190.6	13.1
4	2	0	50.617	931.3	0	239.9	239.9	31.4
4	3	0	11.156	1203.5	45.7	42	42	83.5
4	4	0	10.772	1104.6	0	1427.7	429.7	24.9
4	5	0	20.444	623.8	33.3	505.1	505.1	47.3
4	6	0	17.793	951	0	328	247.7	26.6
4	7	0	0.102	2389.3	1394.1	0	0
5	1	0	12.459	0	0	142.8	142.8	19.4
5	2	0	7.493	2069.8	0	1142.5	227.6	27.5
5	3	0	18.054	1457.1	0	2079.3	622.2	12.9
5	4	0	17.516	1313.1	0	602.2	452.8	19.2
5	5	0	0	2400		0	0
5	6	0	6.248	1654.8	0	112.6	112.6	142.1
5	7	0	4.917	1839	116.6	9.3	9.3	135.1
6	1	1	26.63	1413.3	0	1950.4	537.1	16.3
6	2	1	5.551	2038.3	0	20.4	20.4	10.6
6	3	1	6.416	1950.4	112.6	722.5	102.9	3.3
6	4	1	12.313	1522.5	0	148.8	148.8	48
6	5	1	6.655	1986.6	0	2237.7	251.1	7.4
6	6	1	10.871	1506.8	84	363.5	125.3	85.3
6	7	1	25.952	624.3	0	795.5	493.5	212.8
7	1	1	34.524	690.7	0	1346.2	886.6	4.5
7	2	1	19.359	533.4	0	2048.4	1588	40.2
7	3	1	11.554	1873.8	0	2056.4	297.5	3.4
7	4	1	22.056	1345	0	853.5	229.1	10.1
7	5	1	5.697	1945.4	373	904.2	95.3	1407
7	6	1	12.294	1336.4	0	60.3	28.1	6.9
7	7	1	11.602	1002.6	0	683.4	378.8	415
8	1	1	46.514	1042.2	0	1806	763.8	12.9
8	2	1	18.122	1520.7	0	1840.3	332.1	5
8	3	1	26.241	1006.6	0	2.9	0	2082.6
8	4	1	28.238	1113.1	0	729	198.1	12.7
8	5	1	13.259	739.4	0	956.5	476.4	12.1
8	6	1	27.421	919.5	0	919.7	316.7	1.6
8	7	1	32.593	712.3	0	656.3	509.7	19.9
9	1	1	10.728	2005.6	0	709.5	178.9	6.3
9	2	1	4.454	2043.4	0	1133.2	174.9	49.4
9	3	1	30.675	322.3	0	1411.6	1258.7	67.4
9	4	1	3.894	2211.5	0	2395.4	188.6	109.9
9	5	1	5.721	1699.3	32.4	2147.5	553.8	2.5
9	6	1	3.006	2143.8	0	1490.7	158.4	1.1
9	7	1	4.771	1901.7	39	1981.5	372.2	51.5
10	1	0	14.679	1358	0	788	574.7	6.7
10	2	0	6.113	1908.1	0	2062.9	259.7	11.2
10	3	0	11.85	1656.8	0	595.5	175.1	35
10	4	0	8.305	1716.5	0	2207.6	522.4	2.6
10	5	0	12.629	1282.5	247.5	2400	1117.5
10	6	0	14.882	988.2	0	2172.2	1270.7	13.3
10	7	0	1.901	2288.9	74.7	2400	111.1
11	1	0	17.448	1751.6	0	2272.6	523.4	3.4
11	2	0	6.422	1867.5	0	2044	311.7	23.4
11	3	0	9.147	1838.2	0	1241.8	223.6	244.5
11	4	0	7.205	1904.2	0	1875	280.1	102.9
11	5	0	7.555	1623.6	83.7	0	0
11	6	0	0.059	2397.9	0	2400	2.1
11	7	0	8.674	1654.9	0	2338.7	683.8
12	1	1	.	.	.	.	.	.
12	2	1	4.215	2061.6	0	1671.6	236.2	55.9
12	3	1	11.474	1624	0	245.2	117.7	20.5
12	4	1	12.004	907.3	0	2213.5	1306.2	3.1
12	5	1	13.032	1482.1	0	1375.9	214.9	1.2
12	6	1	6.402	1576	92	1897.4	663	120.9
12	7	1	9.585	1510	0	1448	420.3	465.5
13	1	1	.	.	.	.	.	.
13	2	1	13.481	1494.7	0	1521.8	484.7	1.4
13	3	1	4.858	2078	43.5	948	67.5	1144.6
13	4	1	7.924	1739.9	35.4	1908.6	352.8	18.9
13	5	1	3.92	1966.6	61.7	1662.2	209.4	92.7
13	6	1	23.302	882.7	0	1267.5	581.6	4.2
13	7	1	14.057	1515.7	0	1499.6	344.7	52.6
14	1	0	34.812	943.7	0	1705.2	1121.5	41.8
14	2	0	4.65	1887	0	2109.1	335.9	13.4
14	3	0	5.121	1683.7	189.4	210.6	47.4	4.9
14	4	0	8.248	1569.9	0	2127.2	651.4	22.6
14	5	0	17.534	877.7	86.5	1334.9	867	89.3
14	6	0	3.805	1904.6	40.3	2113.8	303.5	40.8
14	7	0	4.073	2050	0	2347.6	314.6	8.4
15	1	1	7.105	1832.7	0	1540.2	383.8	2.2
15	2	1	4.779	1907.9	0	92.9	81.4	4.7
15	3	1	3.155	2237.7	0	92.1	59.4	3
15	4	1	15.433	1604.1	0	1571.7	408.9	18.1
15	5	1	0.897	2308.2	50.8	2399	91.8	362.3
15	6	1	23.58	682.9	0	1023.1	806.7	33.1
15	7	1	2.732	2197.2	484.3	2191.9	161.2	377.9
16	1	0	20.414	1292.1	0	1740.8	698.2	30.6
16	2	0	11.255	1734	0	545.9	180.9	42.7
16	3	0	17.162	1113.4	0	1786.6	830.6	496.5
16	4	0	26.749	466.9	0	2400	1933.1
16	5	0	0.06	2399.9	2189.5	2400	0.1
16	6	0	9.113	1733.7	0	2345.3	613.9	3.9
16	7	0	3.319	2075.1	488.7	2025.7	276.7	1309.7
