# Supplementary material for: Evaluation of Using Behavioural Changes to Assess Post-Operative Pain in the Guinea Pig (Cavia porcellus)
Source: PLoS One. 2016 Sep 1;11(9):e0161941. doi: 10.1371/journal.pone.0161941 (PMC5008650; doi:10.1371/journal.pone.0161941)
Supplement: S2 Table — (XLSX) [file pone.0161941.s002.xlsx]

## Sheet: Manualy scored behaviour
Guinea pig	Time (1=baseline, 2=anaesthesia 1h, 3=anaesthesia 5h, 4=surgery 1h, 5=surgery 5h, 6= day post surgery 1h, 7=day post surgery 5h)	Treatment group (0=control, 1=treated)	Abdominal contractions frequency	Bar chew duration	Belly press frequency	Chew duration	Climb duration	Coprophagy frequency	Defeacate frequency	Dig frequency	Drink/ play with drinker duration	Eat duration	Flinch frequency	Groom duration	Jump off hopper frequency	Lay down frequency	Lay down duration	Lay down (leg extneded or to side) frequency	Lay down (leg extended or to side) duration	Rear frequency	Rear leg lift frequency	Run or walk duration	Scratch frequency	Shake frequency	Sit on hopper frequency	Sleep duration	Stand duration	Urinate frequency	Vocalise frequency	Writhe frequency	Yawn frequency	Yawn/ stretch frequency
1	1	1	2	0	0	468.058	18.7517	3	1	0	37.6368	64.73	0	0	9	0	0	0	0	48	0	388.847	0	2	9	0	1052.92	0	1	0	0	0
1	2	1	3	0	0	1047.21	0	5	0	0	119.183	240.035	0	40.2728	0	0	0	0	0	7	0	122.587	6	5	0	0	1749.42	0	0	0	0	0
1	3	1	1	106.438	0	658.278	0	0	0	0	6.00588	1042.3	0	0	0	0	0	0	0	1	0	0	0	0	0	0	2366.54	0	0	0	0	0
1	4	1	16	0	0	401.024	0	25	2	0	25.4916	519.475	0	28.9283	0	0	0	0	0	0	0	23.6231	2	1	0	0	2347.8	0	0	0	0	0
1	5	1	13	0	0	1242.36	0	16	0	0	312.039	247.676	0	84.6495	0	0	0	0	0	0	0	0	0	0	0	0	2316.11	1	0	0	2	1
1	6	1	0	24.2904	0	1304.68	1.23454	7	3	0	0	560.382	0	50.5829	1	0	0	0	0	8	0	337.243	0	3	1	0	1802.57	0	0	0	0	0
1	7	1	3	0	0	1183.63	0	6	1	1	18.7851	1050.32	0	78.0097	0	0	0	0	0	2	0	27.5604	1	3	0	0	2283.4	0	0	0	0	0
2	1	0	4	0	0	550.694	7.47398	2	0	0	77.4759	116.347	0	25.9921	0	0	0	0	0	14	0	205.168	2	1	0	0	2000.3	0	0	0	0	0
2	2	0	9	0	0	1450.32	0	10	0	0	0	57.8233	0	49.6628	0	1	87.0185	0	0	2	0	0	1	1	0	0	2255.8	0	0	0	0	0
2	3	0	6	0	0	601.355	0	3	0	0	15.3817	69.3345	0	0	0	0	0	0	0	10	0	3.36997	0	2	0	0	2280.49	0	0	0	2	0
2	4	0	20	0	1	804.755	0	47	1	0	0	220.316	1	112.577	0	1	457.252	5	137.401	1	0	159.089	6	1	0	0	1512.58	1	0	2	0	0
2	5	0	13	0	0	32.1648	0	0	0	0	0	0	0	0	0	0	0	0	0	0	0	0	0	0	0	0	2400.2	0	0	0	0	0
2	6	0	9	0	0	1311.62	0	7	2	0	3.67026	0	0	0	0	0	0	0	0	7	0	0	0	0	0	0	2062.96	0	0	0	0	0
2	7	0	17	0	0	238.8	0	7	0	0	14.35	43.1089	0	0.66732	0	0	0	0	0	1	0	0	0	0	0	0	2379.64	0	0	0	0	0
3	1	0	6	22.3886	2	107.338	11.3778	0	0	0	22.1217	8.04121	0	0	1	0	0	0	0	35	0	202.231	0	2	1	0	1738.67	0	0	0	0	0
3	2	0	19	0	0	1707.17	0	19	0	0	8.87536	133.364	0	24.9244	0	0	0	0	0	3	0	123.821	3	4	0	0	2220.93	1	0	0	0	0
3	3	0	6	20.6536	1	1387.53	0	11	1	0	131.896	208.638	0	41.4072	0	0	0	0	0	1	0	347.54	0	2	0	0	2003.16	1	0	0	0	0
3	4	0	38	0	0	1288.18	0	10	0	0	33.8331	442.099	0	38.7379	0	0	0	3	16.5162	0	11	21.5544	1	1	0	0	2323.38	0	0	0	0	0
3	5	0	27	0	0	26.9597	0	0	0	0	0	0	0	0	0	0	0	0	0	0	0	0	0	0	0	0	2400.26	0	0	0	0	0
3	6	0	3	0	0	1684.37	13.2129	8	3	0	0	742.994	0	51.4837	1	0	0	0	0	8	0	498.822	0	2	0	0	1628.92	0	0	0	0	0
3	7	0	8	0	0	984.731	0	0	0	0	1.96859	90.255	0	0	0	0	0	0	0	2	0	22.6889	0	1	0	0	2352.57	0	0	0	0	0
4	1	0	15	0	0	250.334	31.3307	10	1	0	1.50147	150.647	0	0	14	0	0	0	0	28	0	163.193	2	3	15	0	937.552	1	0	0	0	0
4	2	0	2	0	0	853.376	23.2895	9	0	1	4.53778	145.542	0	0	25	0	0	0	0	34	0	245.073	1	3	28	0	435.679	0	0	0	0	0
4	3	0	13	0	0	84.2825	2.60255	0	0	0	0	22.0549	0	0	2	0	0	0	0	4	0	3.3366	0	1	2	0	1904.61	0	0	0	0	0
4	4	0	8	5.33856	0	1262.54	0	7	0	1	8.57506	888.436	0	65.7926	0	0	0	0	0	4	0	122.019	3	5	0	0	2190.64	0	0	0	0	0
4	5	0	33	0	0	78.7104	0	0	0	0	0	0	0	0	0	0	0	0	0	0	0	0	0	0	0	0	2400.18	0	0	0	0	0
4	6	0	12	0	0	522.145	0	0	0	1	134.865	199.996	0	22.2885	0	0	0	0	0	3	0	86.4179	0	1	0	0	2266.12	0	0	0	0	0
4	7	0	43	0	0	346.372	0	0	0	0	9.87634	0	0	0	0	0	0	0	0	0	0	0	0	1	0	0	2400.16	0	0	0	1	0
5	1	0	5	52.051	0	606.46	18.2178	13	0	3	39.3051	4.43768	0	35.0343	6	0	0	0	0	43	0	222.051	0	5	5	0	1861.98	0	0	0	0	0
5	2	0	24	12.3121	0	896.249	0	14	0	1	76.4081	210.039	0	52.2845	0	0	0	0	0	0	0	18.6516	1	3	0	0	2327.41	0	0	0	0	0
5	3	0	10	36.1354	0	915.22	0	10	2	0	97.5622	78.7771	0	24.8577	0	1	494.45	0	0	5	0	64.7634	1	2	0	0	1626.06	0	0	0	1	0
5	4	0	27	0	0	468.891	0	12	0	0	0	23.4563	0	24.4906	0	2	632.086	2	37.47	0	0	0	0	2	0	0	1706.13	0	0	0	0	0
5	5	0	102	0	0	0	0	0	0	0	0	0	0	0	0	0	0	0	0	0	0	0	0	0	0	0	2400.16	0	0	0	0	0
5	6	0	24	0	0	49.0147	0	0	0	0	0	0	0	0	0	1	169.237	0	0	0	0	0	0	0	0	0	2231.09	0	0	0	0	0
5	7	0	7	0	0	91.0224	0	0	0	0	0	0	0	0	0	1	1642.53	0	0	0	0	0	0	0	0	0	757.77	0	0	0	0	0
6	1	1	8	0.600588	0	736.827	4.00392	4	1	0	18.0844	144.542	0	4.40431	2	0	0	0	0	20	0	299.961	0	1	2	0	1891.21	1	0	0	0	0
6	2	1	8	0	0	987.233	0	1	2	0	5.73895	148.512	0	28.2276	0	0	0	0	0	4	0	273.167	0	1	0	0	2042.32	0	0	0	1	0
6	3	1	7	0	0	651.493	0	4	0	0	0	30.3631	0	0	0	0	0	0	0	7	0	79.9449	0	0	0	0	2195.99	0	0	0	0	0
6	4	1	9	0	0	979.155	0	2	0	0	0	280.341	0	0	0	0	0	0	0	1	0	17.1168	3	0	0	0	2379.45	0	0	0	0	0
6	5	1	8	0	0	1124.47	0	11	0	0	37.6368	162.926	0	0.900882	0	1	571.364	0	0	0	0	0	0	0	0	0	1827.89	0	0	0	1	0
6	6	1	8	0	0	884.23	0	8	0	0	53.152	251.079	0	1.23454	0	0	0	0	0	1	0	39.472	2	1	0	0	2356.13	0	0	0	0	0
6	7	1	3	0	0	845.328	0	3	0	0	4.20412	158.222	0	0	0	0	0	0	0	0	0	0	1	0	0	0	2400.17	0	0	0	0	0
7	1	1	5	82.047	0	28.7281	0	1	1	2	216.345	248.009	0	38.5377	0	0	0	0	0	52	0	516.306	0	3	0	0	1291.84	1	0	0	0	0
7	2	1	9	45.6781	0	182.347	0	23	0	0	174.037	66.7654	0	37.9038	0	0	0	0	0	5	0	68.5004	2	2	0	0	2151.32	0	0	0	0	0
7	3	1	5	33.1992	0	57.89	0	0	7	0	147.978	8.1413	0	8.80862	0	0	0	0	0	9	0	79.1108	0	2	0	0	2209.14	3	0	0	0	0
7	4	1	10	76.575	0	739.513	2.20216	30	11	0	107.205	168.498	0	145.943	3	0	0	0	0	8	0	373.799	2	7	2	0	1705.89	0	0	0	0	0
7	5	1	23	0	0	927.85	0	7	0	0	20.8538	125.189	0	45.4445	0	4	1096.07	1	132.463	0	0	0	0	1	0	0	1126.17	0	0	0	7	0
7	6	1	15	0	2	878.166	0	9	0	0	0	71.6368	0	49.048	0	0	0	0	0	0	0	0	0	1	0	0	2345.47	0	0	0	0	0
7	7	1	17	57.3922	0	1231.61	0	7	0	0	33.5328	117.015	0	51.5838	0	0	0	0	0	0	1	0	1	3	0	0	2348.6	0	0	0	0	0
8	1	1	3	0	0	334.461	22.0549	2	1	1	0	7.34052	0	32.1315	10	0	0	0	0	40	0	286.58	0	3	11	0	1600.44	1	0	0	0	0
8	2	1	3	0	0	473.564	7.04023	16	0	0	0	76.6401	0	2.03533	3	0	0	0	0	18	0	134.231	2	3	4	0	1833.35	0	0	0	0	0
8	3	1	3	22.3552	0	1110.05	8.74189	9	0	0	7.67418	126.624	0	25.4916	6	0	0	0	0	14	0	245.373	0	1	6	0	1786.44	0	0	0	0	0
8	4	1	8	0	0	1421.55	3.47006	41	5	0	7.70755	324.876	0	97.362	5	0	0	0	0	21	0	272.934	1	5	5	0	1843.3	0	0	0	0	0
8	5	1	17	0	0	1097.04	0	18	0	0	43.4425	303.797	0	54.0196	0	0	0	0	0	0	0	49.415	1	1	0	0	2296.75	0	0	0	0	0
8	6	1	8	112.443	1	797.868	4.97153	7	2	0	26.0922	169.299	0	58.5573	6	0	0	0	0	13	0	168.732	2	4	6	0	1975.47	1	0	0	0	0
8	7	1	10	70.9027	0	827.159	7.17369	2	4	0	183.98	149.229	0	24.6908	7	0	0	0	0	10	0	133.03	1	1	7	0	2028.02	1	0	0	0	0
9	1	1	1	104.369	0	1517.77	0	0	0	0	29.6624	172.269	0	0	0	0	0	0	0	5	0	111.743	0	0	0	0	2284.68	0	0	0	0	0
9	2	1	5	21.2208	1	238.7	0	0	0	0	0	3.87046	0	35.9018	0	1	64.4965	0	0	0	0	0	0	0	0	0	2296.19	0	0	0	0	0
9	3	1	3	1028.97	1	392.484	0	6	0	0	40.7065	151.327	0	16.4828	0	0	0	0	0	11	0	106.938	0	1	0	0	2224.36	0	0	0	0	0
9	4	1	12	46.8125	0	563.618	0	6	0	1	17.4504	6.30617	0	20.7203	0	0	0	0	0	5	0	0	0	1	0	0	2336.81	0	0	0	0	0
9	5	1	1	393.352	0	1390.43	0	0	0	2	32.732	288.916	0	23.9234	0	0	0	0	0	5	0	11.9117	1	1	0	0	2274.6	0	0	0	0	0
9	6	1	12	544.833	1	200.789	0	5	0	0	7.47398	227.256	0	0	0	0	0	0	0	7	0	15.6153	0	3	0	0	2142.24	0	0	0	0	0
9	7	1	2	401.66	0	227.89	0	0	0	0	0	45.7782	0	0	0	0	0	0	0	4	0	80.2786	0	1	0	0	2091.06	0	0	0	0	0
10	1	0	5	15.3484	0	1106.25	0	1	0	0	20.3533	119.417	0	2.60255	0	0	0	0	0	1	0	269.931	0	0	0	0	2118	0	0	0	0	1
10	2	0	20	0	0	820.639	0	5	0	0	12.946	235.43	0	192.589	0	0	0	0	0	0	0	92.2236	5	2	0	0	2115.3	0	0	0	7	0
10	3	0	15	0	1	928.576	0	4	0	0	0	290.351	0	20.8538	0	0	0	0	0	6	0	67.2325	4	2	0	0	2275.42	0	0	0	10	0
10	4	0	30	0	0	990.57	0	19	0	0	0	295.856	0	80.2786	0	2	58.2649	3	20.687	0	0	76.01	0	3	0	0	1222.75	0	0	0	3	0
10	5	0	43	0	0	66.1981	0	0	0	0	0	0	0	0	0	0	0	0	0	0	0	0	0	0	0	0	2400.05	0	0	0	1	0
10	6	0	33	18.418	0	549.536	0	21	0	0	0	135.7	0	57.3228	0	0	0	0	0	0	0	10.577	2	3	0	0	2332.2	0	0	0	0	0
10	7	0	43	0	0	429.354	0	3	0	0	0	137.201	0	15.9823	0	2	110.665	0	0	0	0	0	0	1	0	104.703	2168.82	0	0	0	3	0
11	1	0	0	1143.35	0	71.837	11.0441	0	1	0	10.0765	103.435	0	37.7703	12	0	0	0	0	36	0	252.981	0	2	12	0	1618.62	0	0	0	0	0
11	2	0	5	288.983	0	743.928	0	6	0	1	10.844	91.7565	0	20.1864	0	0	0	0	0	1	0	34.8341	1	3	0	0	2330.54	0	0	0	0	0
11	3	0	1	675.061	0	200.63	0	1	1	0	0	8.30813	0	5.67222	0	0	0	0	0	10	0	89.8213	1	3	0	0	1685.86	0	0	0	0	0
11	4	0	9	0	0	644.197	0	13	0	0	7.40725	484.708	0	54.5534	0	4	336.496	2	214.577	0	0	37.7036	1	4	0	0	1756.73	0	0	13	0	0
11	5	0	29	0	0	0	0	0	0	0	0	0	0	0	0	0	0	0	0	0	0	0	0	0	0	0	2400.29	0	0	0	0	0
11	6	0	26	0	0	38.3042	0	0	0	0	0	0	0	21.8547	0	1	211.474	0	0	0	0	0	0	1	0	0	2167.06	0	0	0	0	0
11	7	0	39	0	0	396.321	0	0	0	0	0	51.8174	0	1.06771	0	1	54.2102	0	0	0	0	0	0	0	0	0	2344.82	0	0	0	0	0
12	1	1	7	89.6544	0	1073.28	0.700686	13	0	9	103.535	66.1648	0	31.8312	0	0	0	0	0	23	0	443.201	1	8	0	0	1744.54	0	0	0	0	0
12	2	1	6	0	0	409.367	0	4	0	0	19.1521	0	0	39.6388	0	0	0	0	0	2	0	11.2443	2	0	0	0	2335.76	0	0	0	2	0
12	3	1	5	117.849	0	900.348	0	1	0	2	0	237.633	0	51.417	0	0	0	0	0	7	0	285.98	1	2	0	0	1964.89	0	0	0	5	0
12	4	1	11	14.0471	0	992.672	0	16	0	0	14.0137	214.744	0	30.7968	0	0	0	0	0	0	0	120.852	2	0	0	0	2248.43	0	0	0	3	0
12	5	1	15	79.0441	1	1326.27	0	13	0	0	29.7291	756.974	0	51.1834	0	0	0	0	0	2	0	238.467	4	2	0	0	2045.43	0	2	0	3	0
12	6	1	12	136.233	0	1038.28	0	14	0	0	40.7399	518.107	0	57.7565	0	0	0	0	0	1	0	21.2208	0	2	0	0	2317.13	0	0	0	0	0
12	7	1	3	810.861	0	1107.98	0	7	1	1	0	805.922	0	49.0814	0	0	0	0	0	1	0	115.18	2	2	0	0	2215.16	0	0	0	0	0
13	1	1	16	8.64179	0	1254.72	3.97055	1	0	0	53.2855	72.6378	0	37.5701	1	0	0	0	0	16	0	213.409	1	0	2	0	1885.6	0	2	0	0	0
13	2	1	6	1.03435	0	997.577	0	13	0	0	427.652	243.572	0	38.5711	0	0	0	0	0	2	0	197.927	5	5	0	0	2135.22	0	0	0	0	0
13	3	1	2	0	0	0	0	0	0	0	0	0	0	0	0	0	0	0	0	1	0	0	0	0	0	0	2359.03	0	0	0	0	0
13	4	1	13	33.1324	0	785.002	0	12	0	0	49.2148	508.064	0	88.4533	0	0	0	0	0	1	0	189.352	0	1	0	0	2114.89	1	0	0	0	0
13	5	1	11	0	0	884.699	0	17	0	0	44.31	438.629	0	51.7173	0	1	276.537	0	0	0	0	38.1707	1	3	0	0	2033.78	0	0	0	2	0
13	6	1	6	663.149	0	679.682	2.70265	1	6	0	37.5034	375.668	0	39.2051	1	0	0	0	0	8	0	277.372	1	3	1	0	1986.11	1	0	0	0	0
13	7	1	4	18.1177	0	1800.53	0	7	0	0	32.732	403.629	0	148.912	0	0	0	0	0	1	0	61.8939	1	2	0	0	2186.66	0	0	0	0	0
14	1	0	7	428.753	0	682.061	2.10206	14	0	0	38.7713	30.9636	0	0.100098	2	0	0	0	0	18	0	140.037	2	2	2	0	1796.48	0	0	0	0	0
14	2	0	7	59.5583	0	1339.24	0	12	0	0	537.726	108.039	0	49.3483	0	0	0	0	0	0	0	28.0608	1	2	0	0	2322.74	0	0	0	0	0
14	3	0	7	10.0098	0	1101.11	0	1	0	0	223.319	47.7134	0	0	0	0	0	0	0	0	0	13.0794	0	0	0	0	2386.98	0	0	0	0	0
14	4	0	13	5.57212	0	503.993	0	6	0	0	8.74189	532.487	0	0	0	0	0	0	0	0	2	7.67418	0	0	0	0	2392.81	0	0	0	0	0
14	5	0	64	0	0	95.4935	0	0	4	0	0	0	0	0	0	0	0	0	0	0	1	0	0	0	0	0	2400.33	0	0	0	0	0
14	6	0	16	0	0	1441.52	0	0	0	0	0	420.679	0	9.97643	0	0	0	0	0	2	0	56.3885	0	1	0	0	2318.93	0	0	0	0	0
14	7	0	4	0	0	867.182	0	9	0	0	6.50637	270.498	0	23.3228	0	0	0	0	0	0	0	0	0	1	0	0	2376.76	0	0	0	1	0
15	1	1	3	397.556	0	375.557	0	2	0	0	0	191.71	0	0	0	0	0	0	0	0	0	46.4788	0	0	0	0	2353.68	0	0	0	0	0
15	2	1	2	108.506	0	558.513	0	0	0	0	0	102.667	0	254.85	0	0	0	0	0	1	0	11.3778	1	2	0	0	2126.62	0	0	0	4	0
15	3	1	33	0	0	994.207	0	4	4	0	0	192.922	0	1.10108	0	0	0	0	0	1	0	10.88	1	0	0	0	1272.54	0	0	0	2	0
15	4	1	7	162.96	0	1015.6	0	29	0	0	6.13934	330.657	0	78.3434	0	0	0	0	0	7	0	189.752	1	5	0	0	2081.65	0	0	0	1	0
15	5	1	4	0	0	119.617	0	0	0	0	0	30.2296	0	0	0	0	0	0	0	0	0	0	0	0	0	0	2400.23	0	0	0	0	0
15	6	1	4	426.518	0	74.8066	0	0	0	0	0	83.2815	0	1.23454	0	0	0	0	0	1	0	309.852	1	2	0	0	2087.35	0	0	0	0	0
15	7	1	10	376.836	2	429.721	0	0	0	0	0	49.1815	0	0	0	0	0	0	0	0	0	0	0	0	0	0	2398.98	0	0	0	0	0
16	1	0	0	1009.45	0	492.816	0	0	0	9	49.048	157.821	0	1.16781	0	0	0	0	0	25	0	122.053	1	3	0	0	2061.12	0	0	0	0	0
16	2	0	1	171.401	0	81.7801	0	2	0	2	295.856	12.2453	0	8.4416	0	0	0	0	0	11	0	94.2589	1	1	0	0	2229.67	0	0	0	0	0
16	3	0	1	274.602	0	274.168	0	3	0	0	327.587	45.0107	0	19.8194	0	0	0	0	0	19	0	122.62	1	1	0	0	1963.35	0	0	0	0	0
16	4	0	12	0	0	1253.19	0	37	0	0	3.26987	134.843	0	400.603	0	0	0	0	0	0	4	0	0	0	0	0	1999.74	0	0	0	0	0
16	5	0	25	0	0	0	0	0	0	0	0	0	0	0	0	0	0	0	0	0	1	0	0	0	0	0	2400	0	0	0	0	0
16	6	0	1	48.0137	0	375.668	0	7	0	2	0	43.4092	0	0	0	0	0	0	0	0	0	9.67614	0	0	0	0	2371.37	0	0	0	0	0
16	7	0	5	235.931	0	1310.42	0	10	0	5	29.6624	520.676	0	215.011	0	0	0	0	0	3	0	32.365	0	1	0	0	2120.3	0	0	0	0	0
